# Supplementary material for: Rate-based structural health monitoring using permanently installed sensors
Source: Proc Math Phys Eng Sci. 2017 Sep 13;473(2205):20170270. doi: 10.1098/rspa.2017.0270 (PMC5627375; doi:10.1098/rspa.2017.0270)
Supplement: Supplementary Data - Fatigue [file rspa20170270supp2.xlsx]

## Sheet: Sheet1
92,923 Cycles to failure fatigue experiment					80,907 Cycles to failure fatigue experiment					99,646 Cycles to failure fatigue experiment
Cycle number	Crack length [mm]				Cycle number	Crack length [mm]				Cycle number	Crack length [mm]
4016	25.7994				967	25.6797				1144	25.1954
4960	25.846				2020	25.7273				2998	25.2931
5939	25.8975				3592	25.776				5049	25.3817
6956	25.9463				4496	25.829				7181	25.4818
7845	25.986				5389	25.8606				9130	25.5809
8761	26.035				6228	25.9079				11332	25.6696
9623	26.0788				7158	25.9589				13168	25.7539
10594	26.1225				7959	26.0066				15204	25.8558
11654	26.1877				8852	26.0562				17178	25.9464
12356	26.2379				9768	26.113				18985	26.0306
13419	26.2831				10656	26.1513				20967	26.1339
14354	26.3343				11649	26.2077				22830	26.2262
15348	26.3852				12369	26.2506				24425	26.3142
16396	26.4308				13394	26.307				26242	26.4184
17331	26.483				14123	26.3452				28027	26.5064
18243	26.5316				14974	26.3913				29762	26.6049
19127	26.5763				15836	26.4419				31428	26.6969
20066	26.6227				16701	26.4867				33008	26.7894
21051	26.6805				17563	26.5342				34487	26.8813
21822	26.7216				18316	26.5789				36219	26.9875
22857	26.7761				19118	26.629				37723	27.0659
23550	26.8137				20088	26.6841				39289	27.1725
24631	26.8786				20889	26.735				40722	27.2594
25389	26.9149				21664	26.7843				42043	27.3546
26285	26.9682				22425	26.8265				43601	27.4613
27134	27.0236				23186	26.8691				45011	27.5401
27869	27.0696				23987	26.9273				46541	27.6471
28731	27.1128				24707	26.9696				47810	27.7364
29702	27.1825				25540	27.0298				49302	27.8399
30304	27.2122				26260	27.0687				50649	27.9245
31056	27.2646				27166	27.1216				51972	28.016
31927	27.307				27928	27.1705				53166	28.1148
32734	27.3611				28699	27.2232				54521	28.2133
33527	27.4138				29478	27.272				55594	28.2995
34224	27.4532				30203	27.3228				56768	28.3869
35017	27.5088				30923	27.3738				58179	28.4936
35718	27.5585				31633	27.4271				59283	28.5794
36639	27.6167				32303	27.4687				60364	28.6742
37277	27.6553				32913	27.5211				61522	28.7812
38075	27.7087				33629	27.5694				62539	28.875
38787	27.759				34380	27.6267				63574	28.967
39479	27.8029				34950	27.6719				64518	29.0588
40231	27.8505				35611	27.7262				65503	29.1525
40992	27.9075				36172	27.7741				66432	29.2407
41566	27.9471				36888	27.8264				67611	29.3452
42226	27.9985				37545	27.8827				68439	29.4321
42837	28.0436				38209	27.9378				69344	29.5293
43480	28.0851				38687	27.9724				70364	29.6297
44214	28.1454				39311	28.028				71174	29.7191
44865	28.1887				39921	28.0753				72039	29.8136
45476	28.2425				40431	28.1224				72798	29.9024
46054	28.2857				40982	28.1743				73553	29.9915
46730	28.3436				41564	28.2232				74336	30.0813
47359	28.3923				42138	28.2717				75137	30.1825
48043	28.4491				42721	28.3246				75829	30.2756
48604	28.5002				43287	28.3781				76580	30.3634
49246	28.5439				43911	28.438				77385	30.467
49930	28.5981				44344	28.4823				78013	30.5663
50496	28.6483				44805	28.5234				78641	30.6505
51042	28.6858				45383	28.5743				79269	30.7496
51731	28.7464				45843	28.6215				79879	30.8473
52237	28.7879				46395	28.6807				80516	30.9456
52856	28.8369				46818	28.7212				81094	31.0461
53508	28.8906				47287	28.7722				81617	31.1369
54011	28.9266				47794	28.821				82205	31.232
54690	28.9875				48310	28.8796				82829	31.3312
55182	29.0359				48820	28.9279				83403	31.4312
55743	29.082				49203	28.9689				83932	31.5245
56304	29.1357				49786	29.032				84497	31.6221
56837	29.1771				50246	29.0837				85034	31.7271
57467	29.2378				50647	29.1339				85530	31.8192
57990	29.2912				51080	29.1765				86031	31.9227
58501	29.3376				51540	29.2331				86491	32.012
58971	29.3821				51969	29.2827				86891	32.1009
59463	29.4292				52412	29.3327				87343	32.207
59992	29.4859				52791	29.3868				87734	32.299
60466	29.5353				53165	29.4342				88176	32.3933
60950	29.584				53625	29.4911				88636	32.4959
61415	29.6427				53994	29.529				89060	32.5942
61798	29.6787				54436	29.5847				89428	32.6893
62263	29.7387				54837	29.6411				89829	32.7923
62723	29.7812				55338	29.7013				90212	32.8944
63202	29.8336				55657	29.7403				90562	32.9885
63622	29.8859				56040	29.7897				90912	33.0873
64082	29.9306				56441	29.8415				91295	33.1948
64516	29.9779				56782	29.8904				91596	33.2873
64958	30.031				57133	29.9444				91896	33.3869
65359	30.0719				57548	29.9963				92218	33.4872
65828	30.1314				57926	30.0477				92537	33.5885
66233	30.1768				58300	30.0966				92810	33.6757
66661	30.2273				58628	30.1428				93110	33.7759
67061	30.2692				58988	30.1892				93392	33.8721
67594	30.3368				59326	30.247				93711	33.9852
67966	30.3729				59700	30.3012				93961	34.0765
68335	30.4221				60009	30.3471				94216	34.1725
68759	30.4746				60370	30.4029				94453	34.2741
69109	30.5224				60712	30.4551				94671	34.3644
69560	30.5783				61090	30.5167				94935	34.4763
69901	30.6246				61355	30.5554				95176	34.5807
70224	30.6647				61642	30.6005				95399	34.6781
70665	30.7204				61975	30.6527				95608	34.7746
71052	30.7695				62304	30.7098				95808	34.8701
71362	30.8184				62610	30.7634				96008	34.9703
71703	30.8664				62906	30.8107				96199	35.0715
72044	30.9132				63175	30.8571				96381	35.1724
72376	30.9605				63481	30.9084				96539	35.2664
72759	31.0159				63791	30.9637				96722	35.3737
73109	31.0665				64110	31.0196				96890	35.4724
73459	31.1142				64429	31.0702				97053	35.5674
73764	31.16				64611	31.103				97222	35.6712
74092	31.2048				64972	31.1689				97381	35.7746
74383	31.2529				65213	31.2131				97531	35.8761
74725	31.3063				65532	31.2731				97662	35.967
75057	31.3546				65784	31.3211				97803	36.0663
75357	31.4072				66025	31.3675				97944	36.1694
75648	31.4522				66284	31.4188				98076	36.2735
76017	31.5143				66557	31.4747				98194	36.3709
76281	31.5613				66758	31.5133				98314	36.473
76526	31.5966				67040	31.5664				98424	36.5682
76868	31.6495				67313	31.6245				98534	36.6608
77182	31.7046				67541	31.6728				98656	36.7666
77404	31.7475				67764	31.7233				98766	36.8692
77732	31.8075				67992	31.773				98866	36.9661
77960	31.8499				68251	31.8291				98954	37.0605
78301	31.9145				68460	31.8687				99040	37.146
78505	31.95				68684	31.9239				99127	37.2425
78756	31.9956				68902	31.9719				99227	37.3576
79065	32.0548				69157	32.029				99309	37.4571
79284	32.0978				69339	32.0662				99386	37.5589
79516	32.1474				69594	32.1294				99468	37.6618
79757	32.2036				69786	32.1763				99536	37.755
79939	32.2405				69977	32.2267				99605	37.8547
80208	32.298				70196	32.277				99646	37.9154
80418	32.3397				70419	32.3332
80672	32.3919				70610	32.3811
80900	32.4384				70779	32.4261
81182	32.4992				70983	32.4785
81364	32.5392				71179	32.5272
81591	32.5878				71362	32.5795
81823	32.6445				71535	32.6296
82046	32.6918				71731	32.6833
82215	32.733				71890	32.7281
82465	32.792				72090	32.7851
82665	32.8404				72272	32.8351
82874	32.8875				72463	32.8868
83048	32.9302				72637	32.9343
83280	32.9943				72805	32.9841
83489	33.0487				72983	33.0418
83653	33.0921				73156	33.0897
83821	33.1356				73333	33.1462
84030	33.1918				73475	33.1891
84222	33.2391				73630	33.2366
84418	33.2875				73807	33.2913
84591	33.3311				73967	33.3443
84800	33.3938				74140	33.3996
84964	33.4358				74281	33.4486
85142	33.49				74426	33.5007
85324	33.5438				74567	33.5481
85474	33.5891				74722	33.5994
85634	33.6411				74850	33.6472
85825	33.7037				74990	33.7001
85957	33.7458				75108	33.7438
86103	33.796				75263	33.7987
86267	33.8503				75405	33.851
86403	33.898				75550	33.9073
86544	33.9482				75673	33.9533
86686	33.9992				75800	34.0048
86841	34.0493				75945	34.0591
86986	34.1067				76068	34.1096
87095	34.1488				76214	34.1662
87259	34.211				76323	34.2108
87368	34.2526				76455	34.2668
87519	34.3143				76573	34.3149
87660	34.3732				76683	34.361
87778	34.4241				76782	34.4076
87892	34.4704				76906	34.4631
88033	34.5332				77023	34.5145
88120	34.5742				77146	34.5708
88220	34.6206				77265	34.6277
88343	34.6762				77356	34.6712
88461	34.7321				77442	34.7175
88561	34.7796				77556	34.7754
88675	34.8339				77657	34.8307
88794	34.8928				77748	34.8816
88903	34.9445				77838	34.9322
89012	34.997				77925	34.9822
89144	35.0623				78007	35.0284
89235	35.1116				78085	35.0744
89335	35.1668				78189	35.1341
89413	35.2111				78276	35.1895
89512	35.267				78368	35.2463
89613	35.3242				78436	35.2912
89708	35.379				78518	35.3434
89794	35.432				78600	35.3962
89876	35.4804				78678	35.4503
89967	35.5357				78747	35.4991
90068	35.5982				78811	35.5417
90150	35.6486				78889	35.5992
90227	35.6984				78967	35.6573
90318	35.7529				79041	35.709
90395	35.8035				79100	35.754
90486	35.8647				79169	35.8076
90568	35.9202				79237	35.8613
90636	35.9684				79311	35.9153
90718	36.0243				79370	35.9618
90800	36.0819				79439	36.017
90877	36.1422				79503	36.0658
90950	36.1961				79562	36.1166
91018	36.2498				79621	36.1686
91077	36.2956				79681	36.2241
91141	36.3439				79731	36.2725
91209	36.4015				79781	36.3229
91268	36.4499				79831	36.3739
91342	36.5085				79882	36.4237
91387	36.5513				79941	36.4849
91451	36.6055				80001	36.5469
91510	36.6607				80055	36.6002
91574	36.7158				80092	36.6445
91619	36.7634				80133	36.6883
91683	36.8221				80184	36.7448
91729	36.8711				80234	36.8039
91784	36.9201				80274	36.8502
91839	36.9778				80320	36.912
91879	37.0168				80361	36.9591
91939	37.0755				80403	37.0067
91990	37.1242				80454	37.0672
92041	37.1747				80503	37.1289
92091	37.2263				80544	37.1792
92141	37.2804				80585	37.2327
92192	37.3354				80626	37.2848
92242	37.3933				80663	37.3385
92283	37.4415				80703	37.3924
92325	37.4893				80744	37.4463
92371	37.5497				80786	37.5034
92411	37.6003				80826	37.5588
92443	37.6388				80863	37.617
92480	37.6898				80904	37.6765
92535	37.7586				80907	37.7079
92562	37.8011
92613	37.8728
92644	37.917
92685	37.9771
92713	38.0225
92745	38.0697
92777	38.1194
92804	38.1716
92832	38.2242
92864	38.2796
92887	38.3167
92915	38.3747
92923	38.3941
